# Supplementary material for: Functional graphene nanocomposite as an electrode for the capacitive removal of FeCl3 from water
Source: Royal Society of Chemistry journal article supplement (doi:10.1039/c2jm32175k), 2012-01-01
Supplement: c2jm32175k.pdf [file c2jm32175k.pdf]

# Functional graphene nanocomposite as electrode for capacitive removal of FeCl<sub>3</sub> from water

Zhuo Wang<sup>1</sup>, Lin Yue<sup>1</sup>, Zhao-Tie Liu<sup>2</sup>, Zong-Huai Liu<sup>3</sup>, Zhengping Hao<sup>1\*</sup>

<sup>1</sup>Research Center for Eco-Environmental Sciences, Chinese Academy of Sciences, Beijing 100085, China

<sup>2</sup>Key Laboratory of Applied Surface and Colloid Chemistry, School of Chemistry & Chemical Engineering, Shaanxi Normal University, Xi'an 710062, China

<sup>3</sup>Key Laboratory of Applied Surface and Colloid Chemistry, School of Materials Science and Engineering, Shaanxi Normal University, Xi'an 710062, China

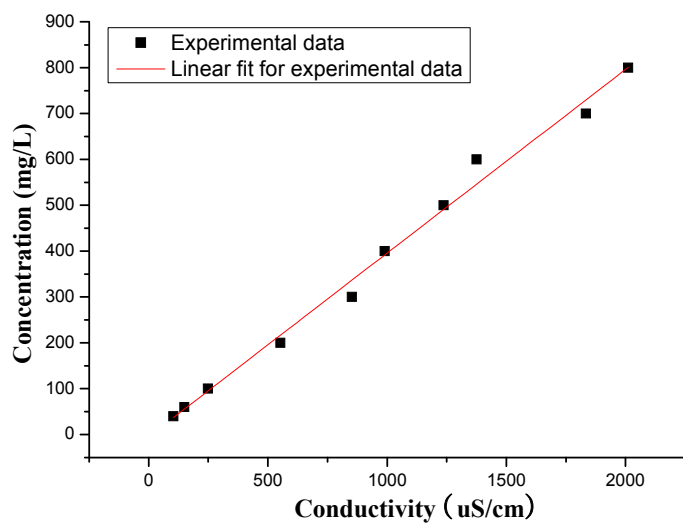

Figure S1 the relationship between conductivity (µS/cm) and solution concentration (mg/L), the regression coefficients  $r^2$  is 0.9917.
